# Supplementary material for: Diagnostic Accuracy of the Deep Learning Model for the Detection of ST Elevation Myocardial Infarction on Electrocardiogram
Source: MDPI journal article supplement (doi:10.3390/jpm12030336), 2022-02-23
Supplement: s1 [file s1]

## Supplementary Figure S1. The 12-lead electrocardiogram and heatmap images of false positive cases by the deep learning model.

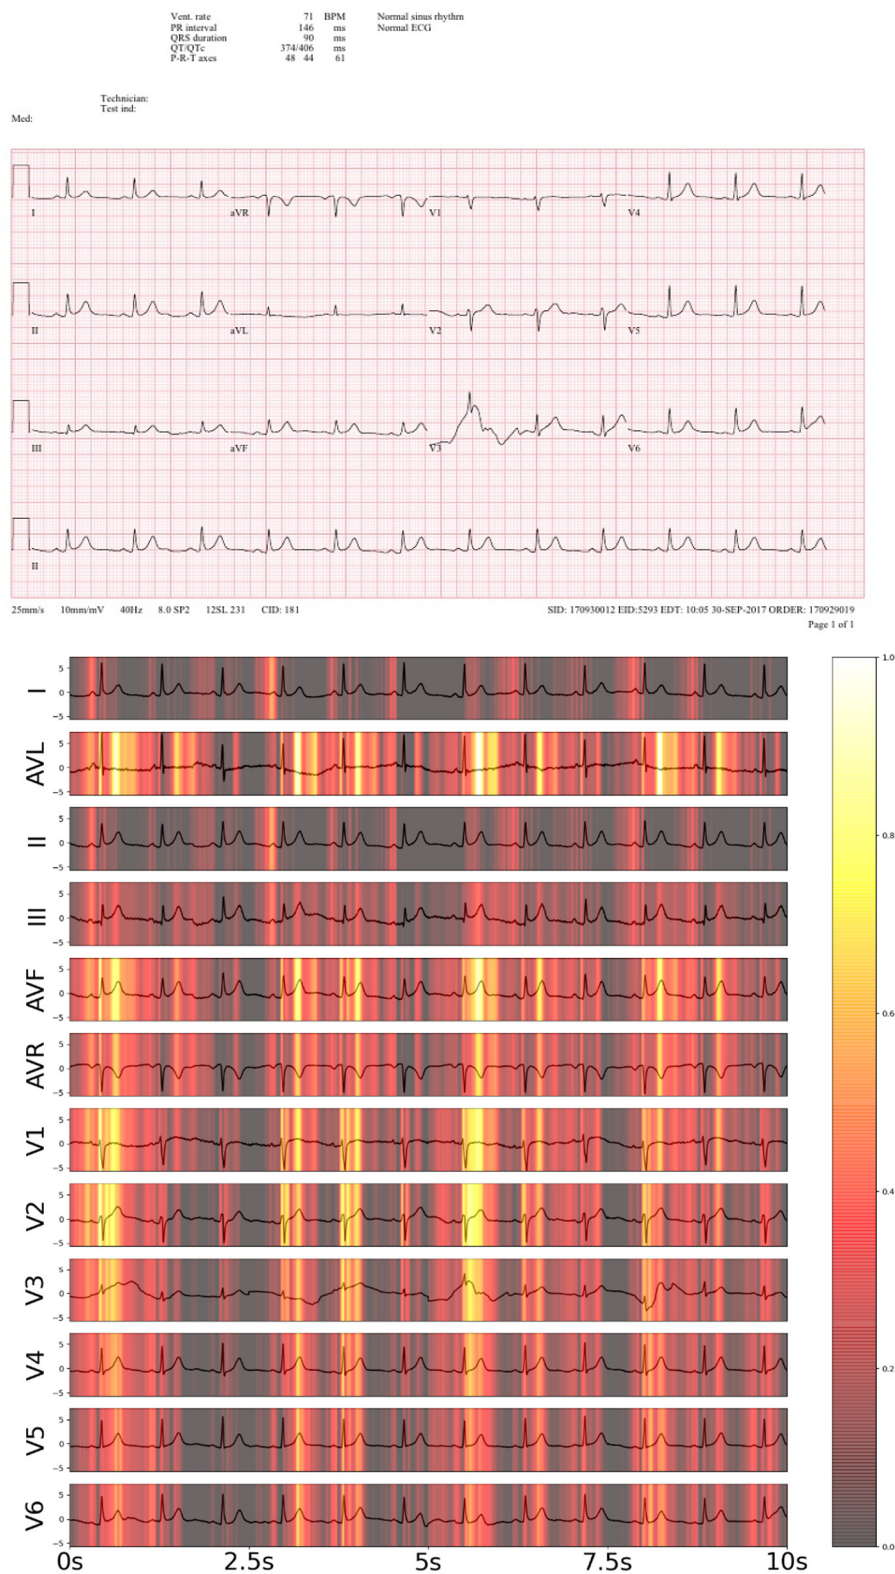

(A) Case 1. In V3 lead, there's a baseline wander with a pointed shape that may be mistaken for ST elevation.

|              |          |     |                     |
|--------------|----------|-----|---------------------|
| Vent. rate   | 75       | BPM | Normal sinus rhythm |
| PR interval  | 142      | ms  | Normal ECG          |
| QRS duration | 100      | ms  |                     |
| QT/QTc       | 388/431  | ms  |                     |
| P-R-T axes   | 49 23 17 |     |                     |

Technician:  
Test ind:

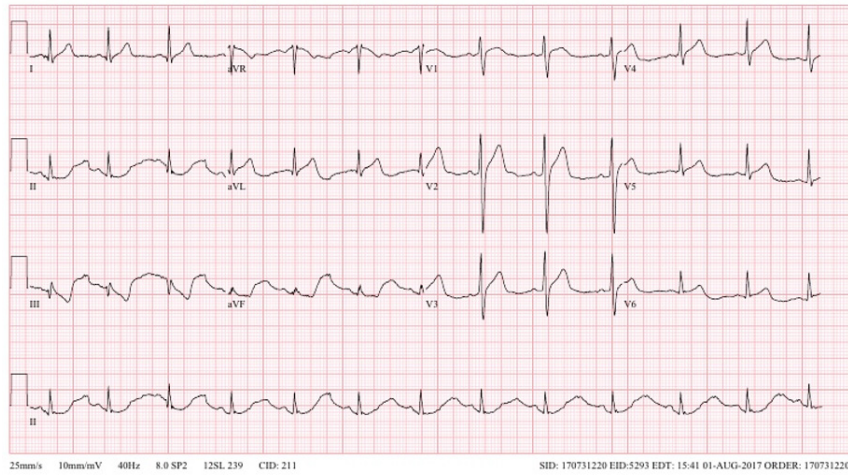

25mm/s 10mm/mV 40Hz 8.0 SP2 12SL 239 CID: 211

SID: 170731220 EID: 5293 EDT: 15:41 01-AUG-2017 ORDER: 170731220

Page 1 of 1

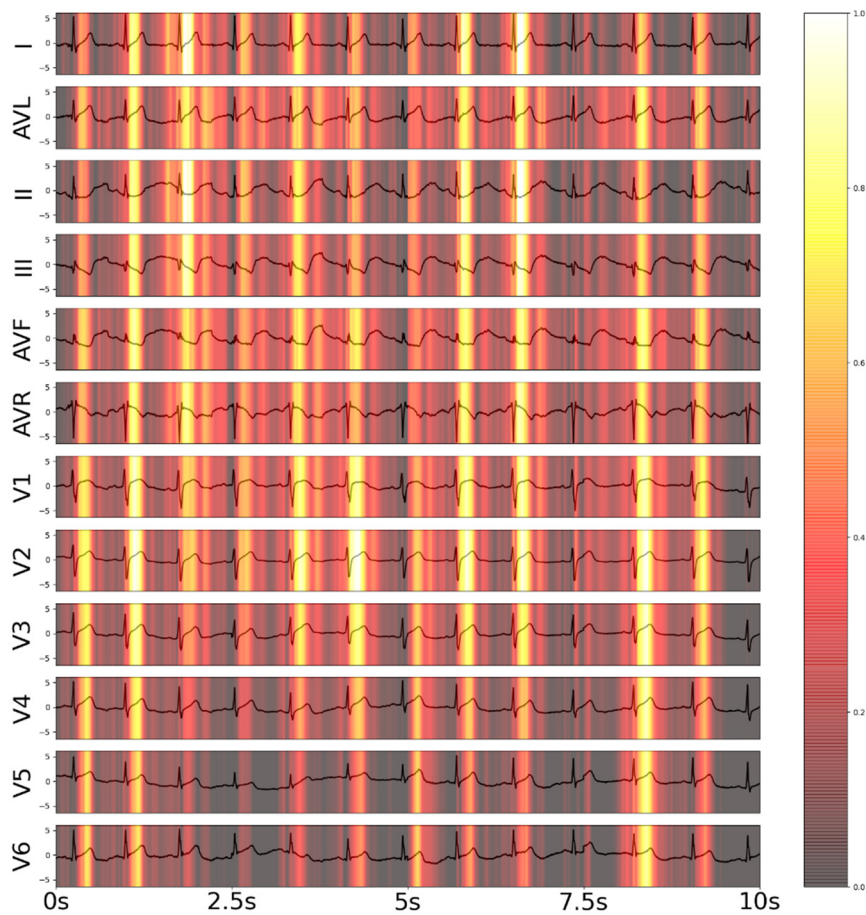

(B) Case 2. Widespread baseline wander in limb leads.

|              |         |     |                     |
|--------------|---------|-----|---------------------|
| Vent. rate   | 69      | BPM | Normal sinus rhythm |
| PR interval  | 170     | ms  | Normal ECG          |
| QRS duration | 96      | ms  |                     |
| QT/QTc       | 412/441 | ms  |                     |
| P-R-T axes   | 8 0 32  |     |                     |

Technician:  
Test ind:

Med:

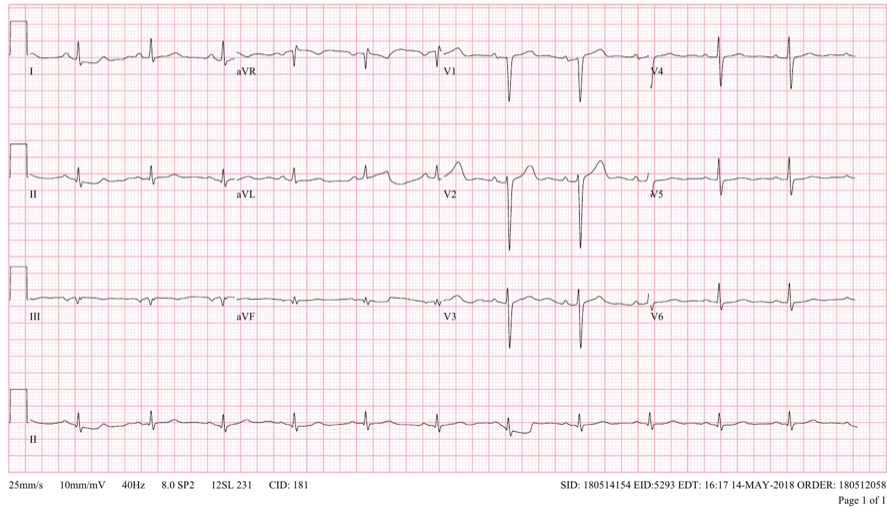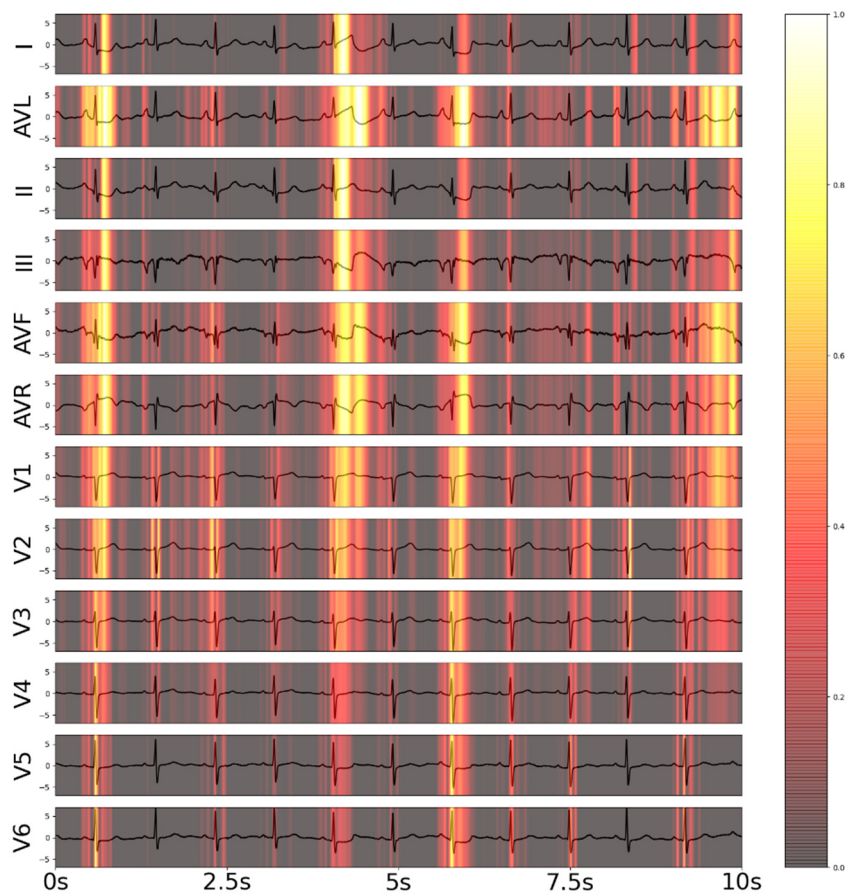

(C) Case 3. Baseline wander causes a misinterpretation of ST elevation in several leads.



|              |         |     |                     |
|--------------|---------|-----|---------------------|
| Vent. rate   | 62      | BPM | Normal sinus rhythm |
| PR interval  | 156     | ms  | Normal ECG          |
| QRS duration | 88      | ms  |                     |
| QT/QTc       | 408/414 | ms  |                     |
| P-R-T axes   | 71 76   | 79  |                     |

Technician:  
Test ind:

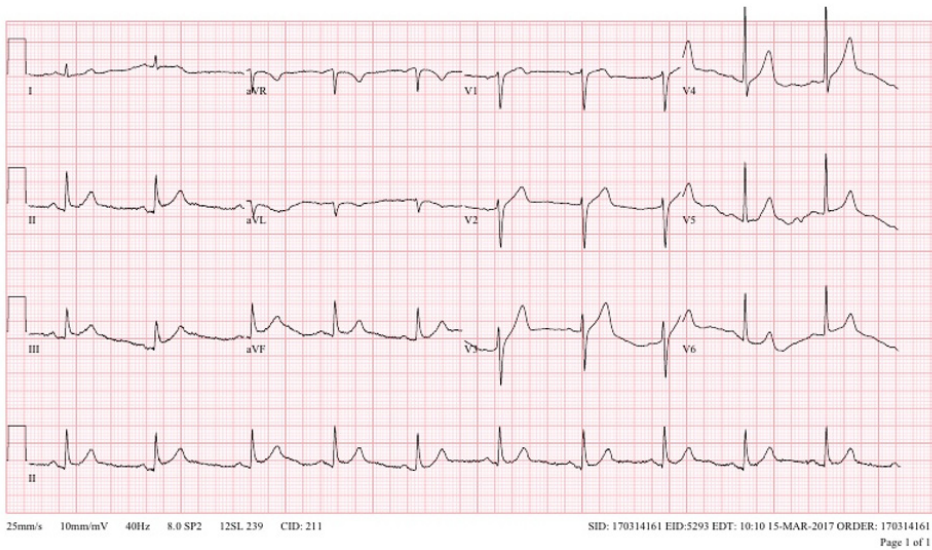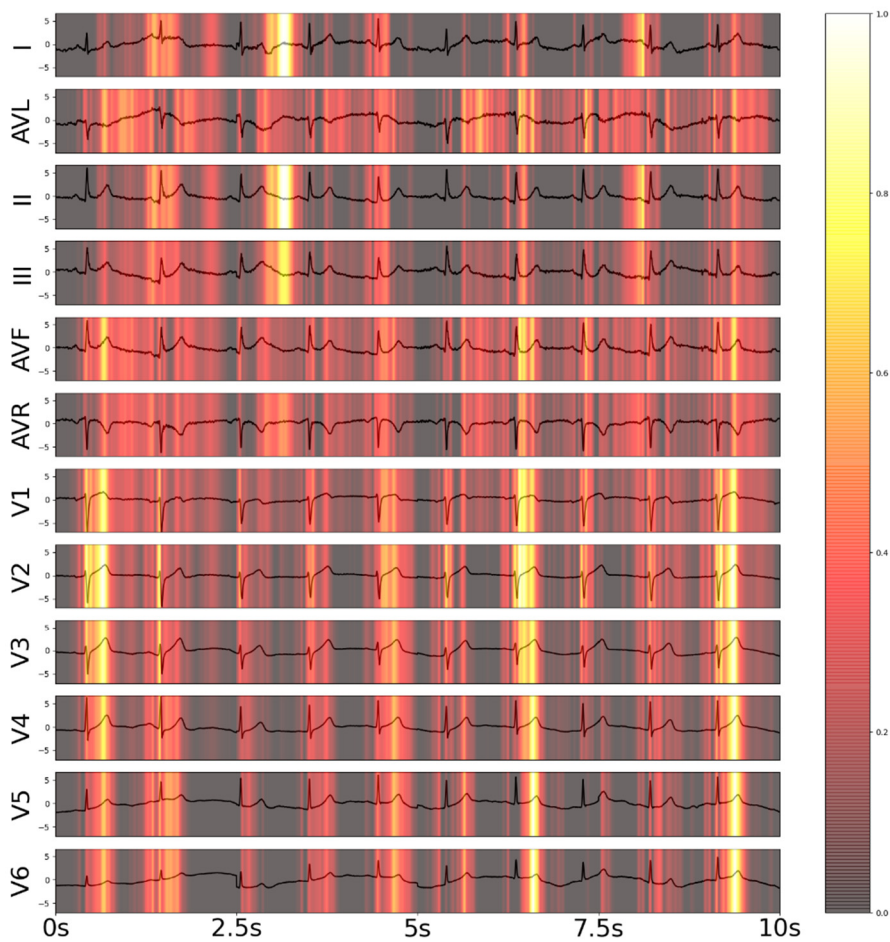

(D) Case 4. Baseline wander causes a misinterpretation of ST elevation in several leads.

|              |          |     |                     |
|--------------|----------|-----|---------------------|
| Vent. rate   | 64       | BPM | Normal sinus rhythm |
| PR interval  | 166      | ms  | Normal ECG          |
| QRS duration | 96       | ms  |                     |
| QT/QTc       | 406/418  | ms  |                     |
| P-R-T axes   | 14 46 70 |     |                     |

Technician:  
Test ind:

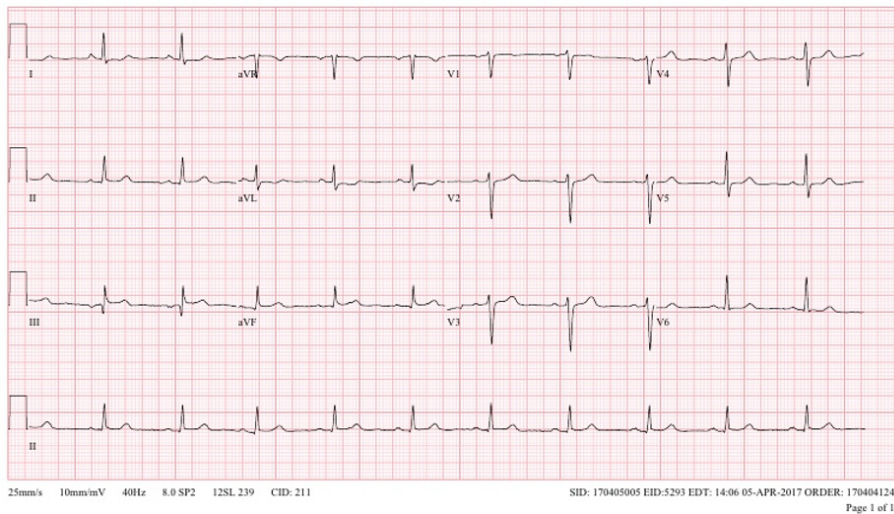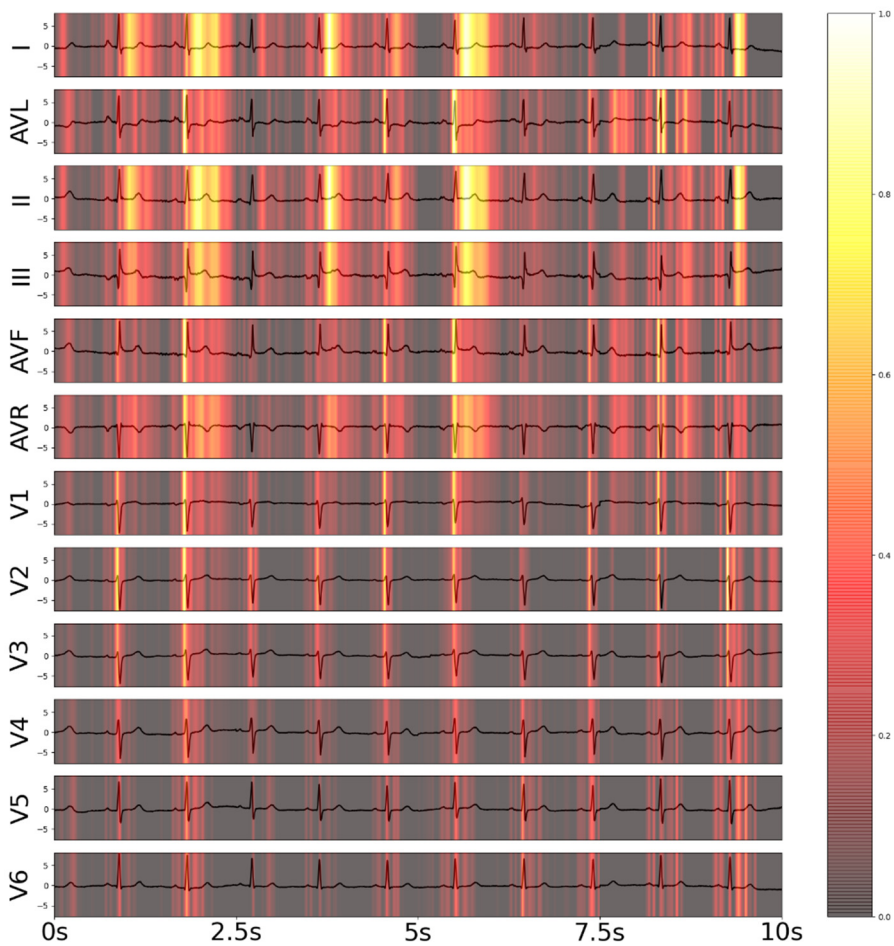

(E) Case 5. A deep learning model detected true ST elevation myocardial infarction with total occlusion of the right coronary artery.

|              |         |     |                     |
|--------------|---------|-----|---------------------|
| Vent. rate   | 60      | BPM | Normal sinus rhythm |
| PR interval  | 192     | ms  | Normal ECG          |
| QRS duration | 112     | ms  |                     |
| QT/QTc       | 414/414 | ms  |                     |
| P-R-T axes   | 57 9 65 |     |                     |

Technician:  
Test ind:

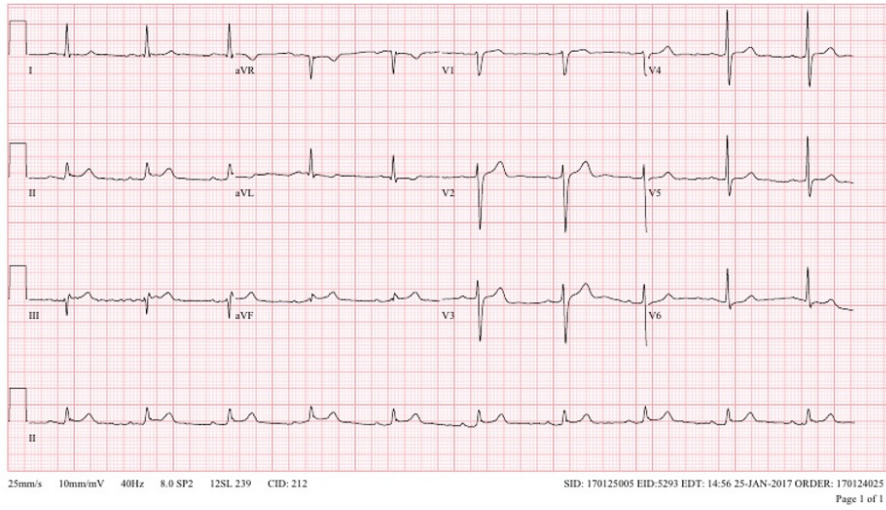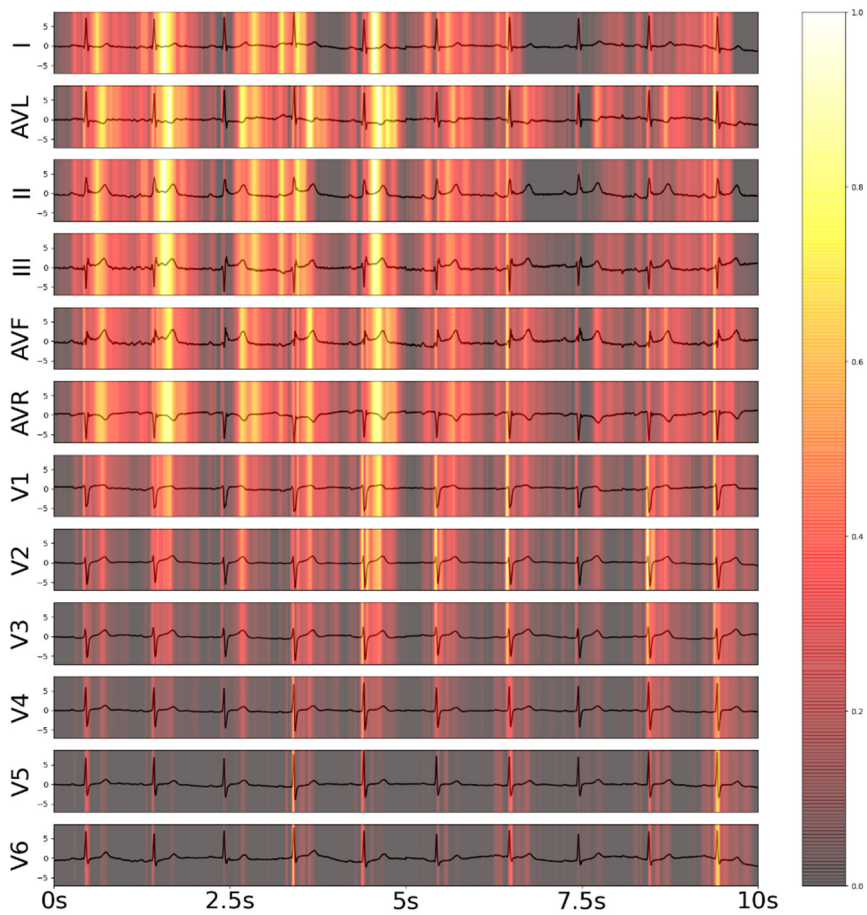

(F) Case 6. A deep learning model detected true ST elevation myocardial infarction with total occlusion of the right coronary artery.
